# Supplementary material for: Aedes aegypti in the Black Sea: recent introduction or ancient remnant?
Source: PubMed Central journal article supplement (PMC6035450; doi:10.1186/s13071-018-2933-2), 2018-07-06

## Additional File 1

**Table S1.** Population information for the *Ae. aegypti* samples used in this study. Populations represented in both microsatellite and SNPs datasets are indicated by bold characters. In the analyses focused on the broader geographical region instead of the population level the populations were grouped as indicated in the “Broad Region” column.

| Population                 | Country                     | Broad Region | Collected  | N<br>(msats/SNPs) |
|----------------------------|-----------------------------|--------------|------------|-------------------|
| Francesville & Lope forest | Gabon                       | Africa       | 2014       | 34/0              |
| Bijagos                    | Gouinea-Bissau              | Africa       | 2009       | 30/0              |
| Rabai-out                  | Kenya                       | Africa       | 2009-2012  | 34/0              |
| <b>Nairobi</b>             | Kenya                       | Africa       | 2012       | 34/8              |
| Dakar                      | Senegal                     | Africa       | 2005       | 34/0              |
| N'goye                     | Senegal                     | Africa       | 2007       | 34/0              |
| <b>Goudiry</b>             | Senegal                     | Africa       | 2012       | 34/12             |
| <b>Sedhiou</b>             | Senegal                     | Africa       | 2012       | 34/12             |
| Kichwamba                  | Uganda                      | Africa       | 2009       | 34/0              |
| <b>Johannesburg</b>        | South Africa                | Africa       | 2015       | 18/9              |
| Luanda                     | Angola                      | Africa       | 2016       | 28/0              |
| Townsville                 | Australia                   | Asia         | 2009       | 34/0              |
| <b>Cairns</b>              | Australia                   | Asia         | 2013       | 34/12             |
| <b>Tahiti</b>              | French Polynesia            | Pacific      | 2010       | 34/12             |
| <b>Attock</b>              | Pakistan                    | Asia         | 2014       | 34/10             |
| <b>Cebu City</b>           | Philippines                 | Asia         | 2013       | 34/8              |
| <b>Riyadh</b>              | Saudi Arabia                | Asia         | 2012       | 34/11             |
| Rayong                     | Thailand                    | Asia         | 2009       | 34/0              |
| Prachuabkhirikan           | Thailand                    | Asia         | 2009       | 34/0              |
| <b>Bangkok</b>             | Thailand                    | Asia         | 2013       | 34/11             |
| <b>Ho Chih Minh</b>        | Vietnam                     | Asia         | 2013       | 34/12             |
| <b>Hanoi</b>               | Vietnam                     | Asia         | 2013       | 34/12             |
| Zugdidi (coast)            | Georgia                     | Black Sea    | 2015       | 22/0              |
| <b>Tbilisi (inland)</b>    | Georgia                     | Black Sea    | 2015       | 15/5              |
| <b>Hopa</b>                | Turkey                      | Black Sea    | 2015       | 20/10             |
| Pazar                      | Turkey                      | Black Sea    | 2015       | 34/0              |
| Cordoba                    | Argentina                   | New World    | 2006       | 26/0              |
| Salta                      | Argentina                   | New World    | 2003, 2014 | 27/0              |
| Cachoeiro                  | Brazil                      | New World    | 2008       | 34/0              |
| <b>Maraba</b>              | Brazil                      | New World    | 2010       | 34/12             |
| Natal                      | Brazil                      | New World    | 2010       | 34/0              |
| <b>Jacobina</b>            | Brazil                      | New World    | 2013       | 34/12             |
| <b>Rio de Janeiro</b>      | Brazil                      | New World    | 2014       | 34/7              |
| <b>Cali</b>                | Colombia                    | New World    | 2013       | 34/6              |
| Dominica                   | Commonwealth of<br>Dominica | New World    | 2009       | 34/0              |
| <b>Siquirres</b>           | Costa Rica                  | New World    | 2014       | 34/6              |
| <b>Tijuana</b>             | Mexico                      | New World    | 2013       | 20/10             |
| Las Palomas, GRO           | Mexico                      | New World    | 2012       | 34/0              |
| Mazatan, CHP               | Mexico                      | New World    | 2012       | 34/0              |

|                             |                                       |              |      |                  |
|-----------------------------|---------------------------------------|--------------|------|------------------|
| <b>Tapachula Norte, CHP</b> | Mexico                                | New World    | 2012 | 34/12            |
| <b>Nogales, SON</b>         | Mexico                                | New World    | 2013 | 34/9             |
| Chetumal, QRO               | Mexico                                | New World    | 2013 | 34/0             |
| <b>Amacuzac, MOR</b>        | Mexico                                | New World    | 2014 | 34/12            |
| Madeira                     | Portugal                              | Atlantic     | 2012 | 34/0             |
| <b>Patillas</b>             | Puerto Rico                           | New World    | 2014 | 34/12            |
| <b>Trinidad</b>             | Republic of<br>Trinidad and<br>Tobago | New World    | 2014 | 34/12            |
| Maricopa County, AZ         | USA                                   | New World    | 2013 | 34/0             |
| <b>Madera, CA</b>           | USA                                   | New World    | 2013 | 34/10            |
| <b>Clovis, CA</b>           | USA                                   | New World    | 2013 | 34/10            |
| <b>New Orleans, NO</b>      | USA                                   | New World    | 2012 | 34/12            |
| Miami, FL                   | USA                                   | New World    | 2011 | 34/0             |
| <b>Columbus, GA</b>         | USA                                   | New World    | 2011 | 34/8             |
| <b>North Key West, FL</b>   | USA                                   | New World    | 2013 | 34/12            |
| Hawaii                      | USA                                   | Pacific      | 2010 | 25/0             |
| Bolivar                     | Venezuela                             | New World    | 2004 | 34/0             |
| Zulia                       | Venezuela                             | New World    | 2004 | 34/0             |
| <i>Aedes mascarensis</i>    | Mauritius                             | Indian Ocean | 2014 | 0/2*             |
| <b>Total</b>                |                                       |              |      | <b>1,795/308</b> |

\*used as outgroup only for the phylogenetic analysis

**Table S2.** Priors and posteriors for the ABC analysis testing scenarios on the origin of Black Sea populations. Priors for splitting time and for population size are all uniform distributions. Posterior probabilities for each scenario depicted in Fig. 2 are shown with 95% confidence intervals. Error and posterior distributions of parameters (mean with 90% confidence interval) are reported for the best-fit scenarios. Divergence times are measured in generations.

| Parameter                 | Details                                                      | Prior         | Posterior                   |
|---------------------------|--------------------------------------------------------------|---------------|-----------------------------|
| Colonization scenario     | Scenario 1 – Black Sea from merge between Asia and New World | N/A           | 0.004 [0.000, 0.023]        |
|                           | <b>Scenario 2</b> – Black Sea from New World                 | N/A           | <b>0.411 [0.391, 0.430]</b> |
|                           | <b>Scenario 3</b> – Black Sea from Asia                      | N/A           | <b>0.560 [0.545, 0.574]</b> |
|                           | Scenario 4 – Black Sea from Africa                           | N/A           | 0.026 [0.007, 0.044]        |
|                           | Scenario 5 – Black Sea from New World                        | N/A           | 0.001 [0.0000, 0.019]       |
| <b>SCENARIO 2</b>         |                                                              |               |                             |
| Effective population size | Africa                                                       | 100 – 450,000 | 199,000 [82,900 – 370,000]  |
|                           | New World                                                    | 100 – 400,000 | 70,400 [14,400 – 207,000]*  |
|                           | Black Sea                                                    | 100 – 400,000 | 80,800 [55,300 – 232,000]*  |
|                           | Asia                                                         | 100 – 400,000 | 193,000[40,800 – 350,000]*  |
| <sup>l</sup> Split time   | New World from Africa                                        | 4,500 – 6,000 | 5,340 [4,720 – 5,930]       |
|                           | Asia from America                                            | 500 – 1,800   | 1,550 [1,080 – 1,790]       |
|                           | Black Sea from America                                       | 100 – 1,800   | 876 [305 – 1,630]           |
| Confidence                | Type I error (Simulated under scenario 2)                    | N/A           | 0.120                       |
|                           | Type II error (Simulated under scenario 1)                   | N/A           | 0.000                       |
|                           | Type II error (Simulated under scenario 3)                   | N/A           | 0.180                       |
|                           | Type II error (Simulated under scenario 4)                   | N/A           | 0.012                       |
|                           | Type II error (Simulated under scenario 5)                   | N/A           | 0.032                       |
|                           | <b>SCENARIO 3</b>                                            |               |                             |
| Effective population size | Africa                                                       | 100 – 450,000 | 207,000 [88,500 – 379,000]  |
|                           | Asia                                                         | 100 – 400,000 | 196,000 [41,800 – 351,000]* |
|                           | New World                                                    | 100 – 400,000 | 72,700 [14,200 – 205,000]*  |
|                           | Black Sea                                                    | 100 – 400,000 | 79,900[55,000 – 231,000]*   |
| <sup>l</sup> Split time   | New World from Africa                                        | 4,500 – 6,000 | 5,350 [4,730 – 5,930]       |
|                           | Asia from America                                            | 500 – 1,800   | 1,570 [981 – 1,750]         |
|                           | Black Sea from Asia                                          | 100 – 1,800   | 953 [431 – 1,490]           |
| Confidence                | Type I error (Simulated under scenario 3)                    | N/A           | 0.300                       |
|                           | Type II error                                                |               |                             |

|               |                                                              |                                           |                                                                         |
|---------------|--------------------------------------------------------------|-------------------------------------------|-------------------------------------------------------------------------|
|               | (Simulated under scenario 1)<br>Type II error                | N/A                                       | 0.002                                                                   |
|               | (Simulated under scenario 2)<br>Type II error                | N/A                                       | 0.100                                                                   |
|               | (Simulated under scenario 4)<br>Type II error                | N/A                                       | 0.000                                                                   |
|               | (Simulated under scenario 5)                                 | N/A                                       | 0.044                                                                   |
| Mutation rate | Microsatellite –Generalized Stepwise<br>Mutation Model (GSM) | $9.0 \times 10^{-06} - 1 \times 10^{-05}$ | $9.5 \times 10^{-06}$ [ $9.07 \times 10^{-06} - 9.96 \times 10^{-06}$ ] |

<sup>1</sup> Time in generations.

\* Cases where the median of the absolute error/true value is > 0.3 that indicate low accuracy in the estimation of the specific parameter and scenario.

**Table S3.** Climatic data for Black Sea sampling localities (indicated by bold characters) and indicative worldwide sampling localities where *Ae. aegypti* is established as downloaded from [www.worldclim.com](http://www.worldclim.com).

| Site             | TempAnnual  | maxTempWarmMonth | minTempColdMonth | meanTempWetQuar | meanTempDryQuar | meanTempWarmQuar | meanTempColdQuar |
|------------------|-------------|------------------|------------------|-----------------|-----------------|------------------|------------------|
| Nairobi          | 17.8        | 26.3             | 10.1             | 18.7            | 16.2            | 19.1             | 15.9             |
| Johannesburg     | 16.2        | 26.5             | 2.2              | 19.9            | 10.8            | 20.2             | 10.7             |
| Bangkok          | 28          | 34.6             | 20.3             | 28.1            | 26.2            | 29.5             | 26               |
| Hanoi            | 23.9        | 33.1             | 13.4             | 28.5            | 17.5            | 29.1             | 17.5             |
| <b>Zugdidi</b>   | <b>13.6</b> | <b>27.6</b>      | <b>0.4</b>       | <b>21.8</b>     | <b>12.2</b>     | <b>21.8</b>      | <b>5.2</b>       |
| <b>Tsereteli</b> | <b>11.8</b> | <b>29.2</b>      | <b>-4.1</b>      | <b>19.7</b>     | <b>1.3</b>      | <b>21.9</b>      | <b>1.3</b>       |
| <b>Hopa</b>      | <b>12.4</b> | <b>25.4</b>      | <b>0.5</b>       | <b>10.1</b>     | <b>10.5</b>     | <b>19.9</b>      | <b>4.9</b>       |
| <b>Pazar</b>     | <b>8.1</b>  | <b>23.3</b>      | <b>-5.5</b>      | <b>11.8</b>     | <b>0.3</b>      | <b>16.8</b>      | <b>-1.2</b>      |
| Jacobina         | 23          | 30.3             | 15.7             | 24.5            | 22.5            | 24.5             | 20.8             |
| Rio de Janeiro   | 22.4        | 29.7             | 15.2             | 24.9            | 20              | 25.2             | 20               |
| Nogales          | 16.5        | 34               | -0.5             | 24.4            | 19.4            | 24.9             | 8.4              |
| New Orleans      | 20.3        | 32.7             | 5.8              | 27.2            | 16.7            | 27.5             | 12.3             |
| Miami            | 24.2        | 31.5             | 15.5             | 27              | 20              | 27.8             | 20               |

Temperature is estimated in ° C. Abbreviations: TempAnnual: mean annual temperature, maxTempWarmMonth: maximum temperature for the warmest month of the year, minTempColdMonth: minimum temperature for the coldest month of the year, meanTempWetQuar: mean temperature for the wettest quarter of the year, meanTempDryQuar: mean temperature for the driest quarter of the year, meanTempWarmQuar: mean temperature for the warmest quarter of the year, meanTempColdQuar: mean temperature for the coldest quarter of the year.

**Table S4.** Genetic diversity. Summary of the population genetic diversity statistics for the 56 populations of *Ae. aegypti* consisting the microsatellite dataset.

| Population                 | Na   | Ne   | Ho   | He   | uHe  | Fis   | AR(30) |
|----------------------------|------|------|------|------|------|-------|--------|
| Luanda, Angola             | 6.17 | 3.40 | 0.62 | 0.67 | 0.68 | 0.07  | 5.36   |
| Dakar, Senegal             | 4.92 | 2.62 | 0.61 | 0.57 | 0.57 | -0.08 | 4.20   |
| Bijagos, Gouinea-Bissau    | 6.42 | 3.59 | 0.60 | 0.65 | 0.66 | 0.09  | 5.70   |
| Kichwamba, Uganda          | 6.08 | 3.77 | 0.62 | 0.69 | 0.70 | 0.10  | 5.58   |
| N'goye, Senegal            | 6.50 | 3.84 | 0.64 | 0.69 | 0.70 | 0.07  | 5.53   |
| Goudiry, Senegal           | 4.25 | 2.76 | 0.50 | 0.59 | 0.60 | 0.16  | 3.85   |
| Sedhiou, Senegal           | 4.83 | 2.74 | 0.60 | 0.58 | 0.59 | -0.03 | 4.34   |
| Francesville, Gabon        | 7.17 | 4.02 | 0.62 | 0.70 | 0.71 | 0.10  | 6.15   |
| Johannesburg, South Africa | 5.92 | 3.33 | 0.62 | 0.63 | 0.64 | <0.01 | 5.66   |
| Maricopa, AZ, USA          | 4.33 | 2.52 | 0.54 | 0.56 | 0.57 | 0.05  | 3.95   |
| Tijuana, Mexico            | 2.92 | 2.40 | 0.62 | 0.55 | 0.56 | -0.13 | 2.91   |
| Madera, CA, USA            | 3.92 | 2.62 | 0.53 | 0.54 | 0.55 | 0.02  | 3.60   |
| Clovis, CA, USA            | 3.25 | 2.36 | 0.44 | 0.48 | 0.48 | 0.05  | 3.14   |
| New Orleans, NO, USA       | 5.83 | 3.06 | 0.58 | 0.61 | 0.62 | 0.05  | 4.86   |
| Cali, Colombia             | 4.17 | 2.25 | 0.46 | 0.52 | 0.53 | 0.15  | 3.56   |
| Bolivar, Venezuela         | 4.25 | 2.61 | 0.55 | 0.56 | 0.57 | <0.01 | 3.82   |
| Cachoeiro, Brazil          | 4.00 | 2.24 | 0.46 | 0.49 | 0.50 | 0.09  | 3.50   |
| Zulia, Venezuela           | 3.92 | 2.58 | 0.55 | 0.52 | 0.53 | -0.09 | 3.65   |
| Maraba, Brazil             | 4.08 | 2.47 | 0.53 | 0.56 | 0.57 | 0.04  | 3.64   |
| Natal, Brazil              | 3.75 | 2.21 | 0.48 | 0.48 | 0.49 | 0.01  | 3.30   |
| Miami, FLO, USA            | 5.42 | 3.45 | 0.65 | 0.63 | 0.63 | -0.05 | 4.68   |
| Las Palomas, Mexico        | 3.83 | 2.67 | 0.56 | 0.56 | 0.57 | -0.02 | 3.57   |
| Mazatan, Mexico            | 3.25 | 2.24 | 0.51 | 0.48 | 0.48 | -0.05 | 3.14   |
| Columbus, GA, USA          | 4.83 | 3.22 | 0.64 | 0.62 | 0.63 | <0.01 | 4.32   |
| Tapachula, Mexico          | 3.58 | 2.22 | 0.50 | 0.49 | 0.49 | -0.02 | 3.27   |
| Jacobina, Brazil           | 3.83 | 2.07 | 0.43 | 0.44 | 0.45 | 0.05  | 3.35   |
| Nogales, Mexico            | 4.00 | 2.40 | 0.55 | 0.55 | 0.56 | <0.01 | 3.70   |
| Chetumal, Mexico           | 3.67 | 2.47 | 0.53 | 0.49 | 0.50 | -0.06 | 3.48   |
| Siquirres, Costa Rica      | 4.33 | 2.88 | 0.58 | 0.60 | 0.61 | 0.04  | 3.96   |
| Rio de Janeiro, Brazil     | 4.42 | 2.15 | 0.42 | 0.48 | 0.49 | 0.11  | 3.89   |
| Amacuzac, Mexico           | 4.00 | 2.87 | 0.55 | 0.55 | 0.56 | <0.01 | 3.76   |
| Cordoba, Argentina         | 4.08 | 2.56 | 0.56 | 0.56 | 0.58 | 0.03  | 3.75   |
| Salta, Argentina           | 5.17 | 3.40 | 0.63 | 0.63 | 0.65 | 0.00  | 4.85   |
| Key West, FLO, USA         | 4.92 | 3.18 | 0.62 | 0.62 | 0.63 | 0.01  | 4.37   |
| Patillas, Puerto Rico      | 4.33 | 2.98 | 0.57 | 0.54 | 0.55 | -0.07 | 4.03   |
| Trinidad                   | 4.17 | 2.66 | 0.47 | 0.53 | 0.53 | 0.15  | 3.87   |
| Dominica                   | 3.50 | 2.33 | 0.44 | 0.46 | 0.47 | 0.02  | 3.28   |
| HCM, Vietnam               | 5.17 | 2.74 | 0.60 | 0.59 | 0.60 | -0.02 | 4.46   |
| Hanoi, Vietnam             | 3.42 | 2.09 | 0.46 | 0.47 | 0.48 | 0.09  | 3.20   |
| Cebu City, Philippines     | 5.50 | 2.77 | 0.58 | 0.58 | 0.59 | <0.01 | 4.66   |

|                            |      |      |      |      |      |       |      |
|----------------------------|------|------|------|------|------|-------|------|
| Attock, Pakistan           | 4.75 | 2.94 | 0.52 | 0.59 | 0.59 | 0.12  | 4.31 |
| Saudi Arabia               | 5.08 | 2.97 | 0.58 | 0.58 | 0.60 | <0.01 | 4.53 |
| Rayong, Thailand           | 4.33 | 2.48 | 0.56 | 0.55 | 0.56 | <0.01 | 3.94 |
| Prachuabkhirikan, Thailand | 4.75 | 2.58 | 0.53 | 0.59 | 0.56 | 0.09  | 4.15 |
| Townsville, Australia      | 3.83 | 2.63 | 0.51 | 0.55 | 0.56 | 0.07  | 3.63 |
| Cairns, Australia          | 4.08 | 2.74 | 0.59 | 0.6  | 0.60 | 0.02  | 3.76 |
| Bangkok, Thailand          | 4.67 | 2.84 | 0.59 | 0.59 | 0.60 | -0.01 | 4.20 |
| Madera, Portugal           | 3.58 | 2.43 | 0.48 | 0.54 | 0.55 | 0.12  | 3.30 |
| Hawaii, USA                | 3.25 | 2.15 | 0.52 | 0.49 | 0.50 | -0.07 | 3.12 |
| Tahiti, French Polynesia   | 4.33 | 2.50 | 0.57 | 0.58 | 0.59 | 0.02  | 3.93 |
| Rabai-out, Kenya           | 8.08 | 3.86 | 0.66 | 0.69 | 0.71 | 0.06  | 6.43 |
| Nairobi, Kenya             | 7.75 | 3.61 | 0.60 | 0.68 | 0.70 | 0.11  | 6.20 |
| Hopa, Turkey               | 3.17 | 2.32 | 0.50 | 0.52 | 0.54 | 0.03  | 3.10 |
| Pazar, Turkey              | 3.08 | 2.00 | 0.53 | 0.47 | 0.48 | -0.04 | 2.70 |
| Coast, Georgia             | 3.00 | 2.16 | 0.50 | 0.51 | 0.52 | <0.01 | 2.92 |
| Inland, Georgia            | 2.67 | 2.00 | 0.42 | 0.45 | 0.46 | 0.05  | 2.67 |

Abbreviations: Na: total number of different alleles, Ho: observed Heterozygosity, He: expected Heterozygosity, uHe: Unbiased Expected Heterozygosity, Ne: Number of effective alleles, Fis: Fixation index, AR(30): allele richness estimated by rarefaction (N=30 genes).

## Figure Legends

**Figure S1.** STRUCTURE bar plots based on the microsatellites dataset, including equal number of populations from each region. Population names are reported on their X axes. For each STRUCTURE run only the number of genetic clusters supported by the Evanno method is presented. For details see legend of Fig. 4.

**Figure S2.** STRUCTURE bar plots based on the microsatellites dataset, including equal number of *Ae. ae. aegypti* populations from each region. For each STRUCTURE run only the number of genetic clusters supported by the Evanno method is presented. For details see legend of Fig. 4.

**Figure S3.** Principal Components Analysis (PCA) on the global (a) and the *Ae. ae. aegypti* (b) microsatellite dataset as implemented and plotted using the ade4 package in R. Populations originated from different regions are presented with different colors. A barplot of the eigenvalues of the each PCA analysis is shown in the respective inset. *Abbreviations:* Aus, Australia; Pac, Pacific; Atl, Atlantic; BS, Black Sea.

**Figure S4.** Discriminant Analysis of Principal Components (DAPC) for the *Ae. ae. aegypti* populations based on the microsatellite dataset. The graph represents the individuals as dots and the groups as inertia ellipses. A barplot of eigenvalues for the discriminant analysis (DA eigenvalues) is displayed in the inset. The number of bars represent the number of discriminant functions that retained in the analysis and the eigenvalues correspond to the ratio of the variance between groups over the variance within groups for each discriminant function.

**Figure S5.** Discriminant Analysis of Principal Components (DAPC) for the *Ae. aegypti* populations collected from Turkey and Georgia based on the microsatellite dataset. For details see legend of Fig. S4.

**Figure S6.** Assignment test as implemented in GeneClass2 for the Black Sea populations and using the remaining worldwide populations as reference panel. The individual mosquitoes from Georgia and Turkey were assigned to the populations presented on the X axis of the barplots. The percentage of assignment for each one the Black Sea population to each one of the reference panel's population is presented on the Y axis.



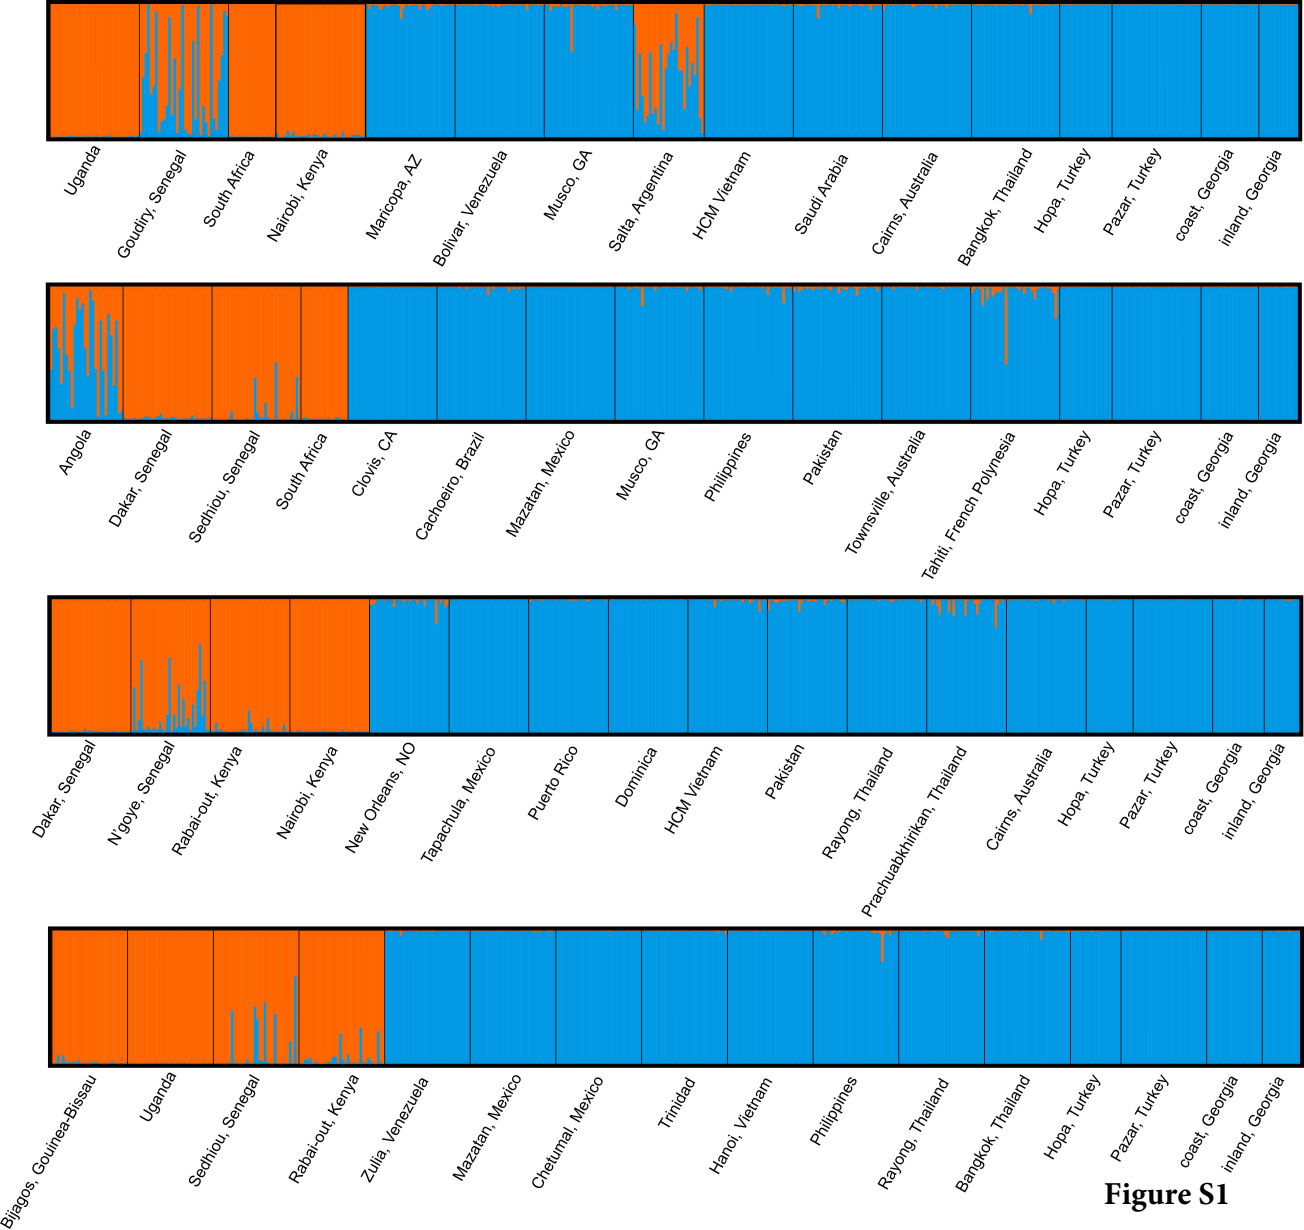

**Figure S1**

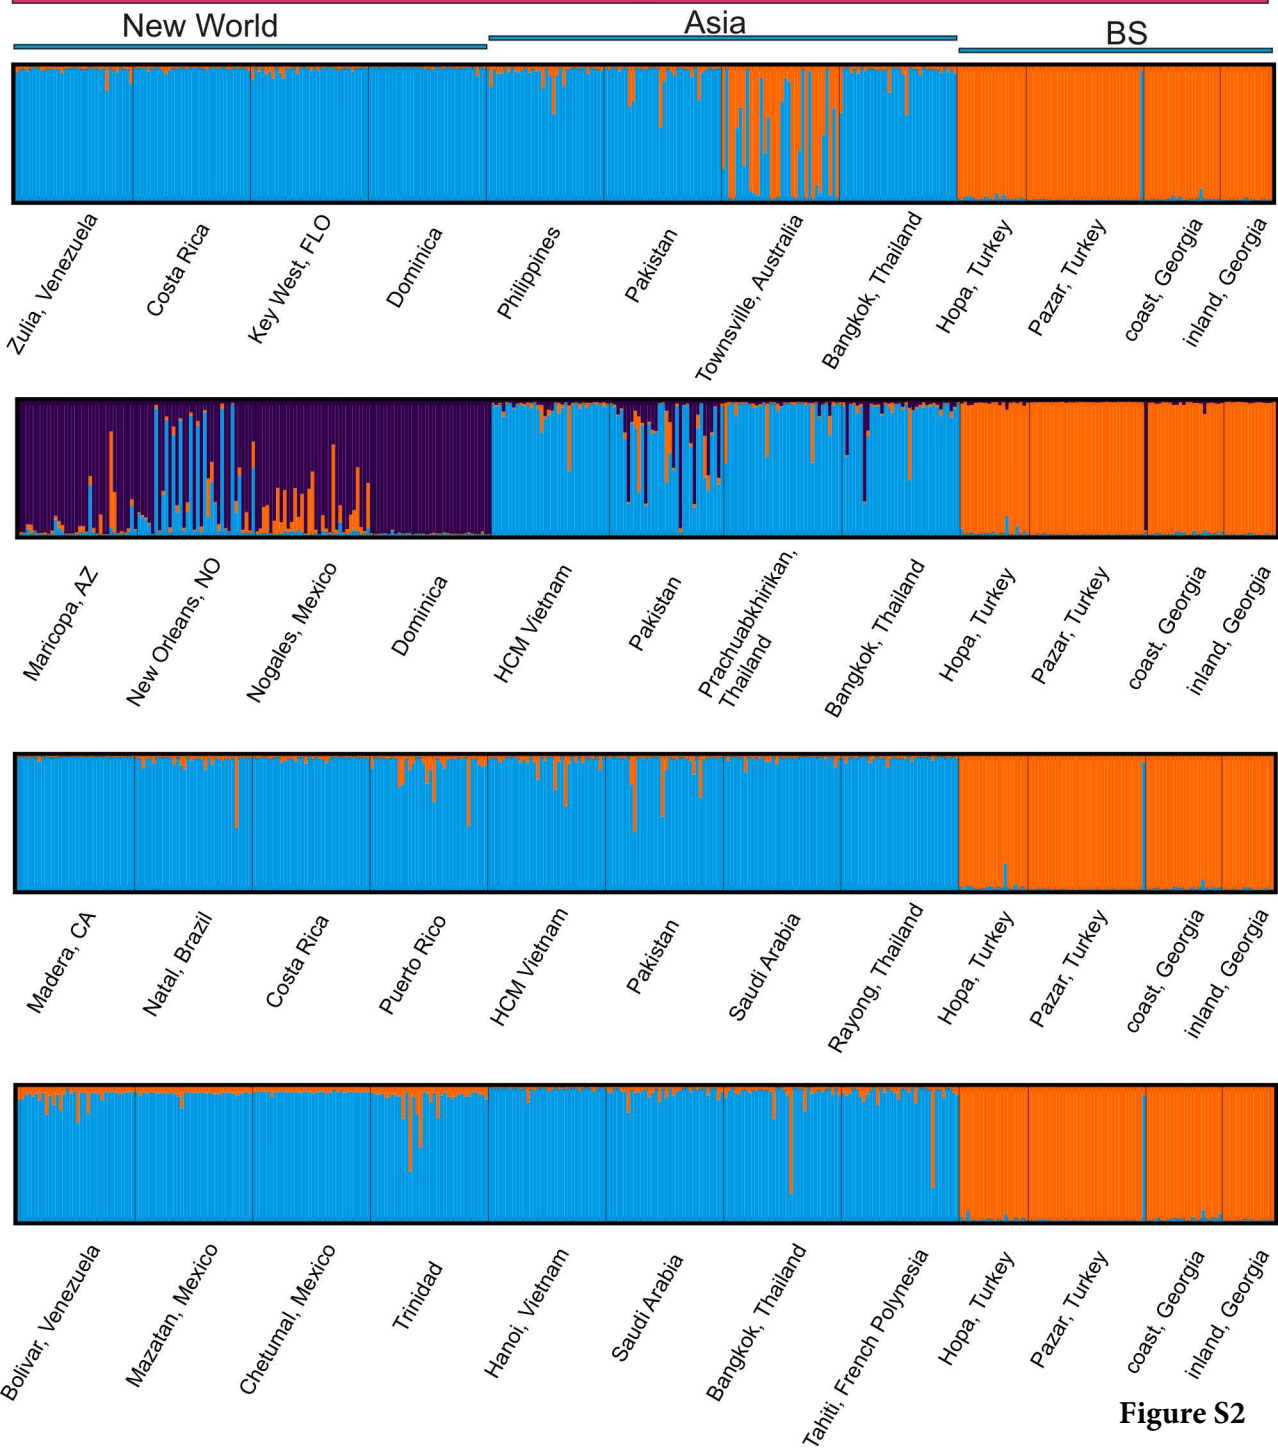**Figure S2**

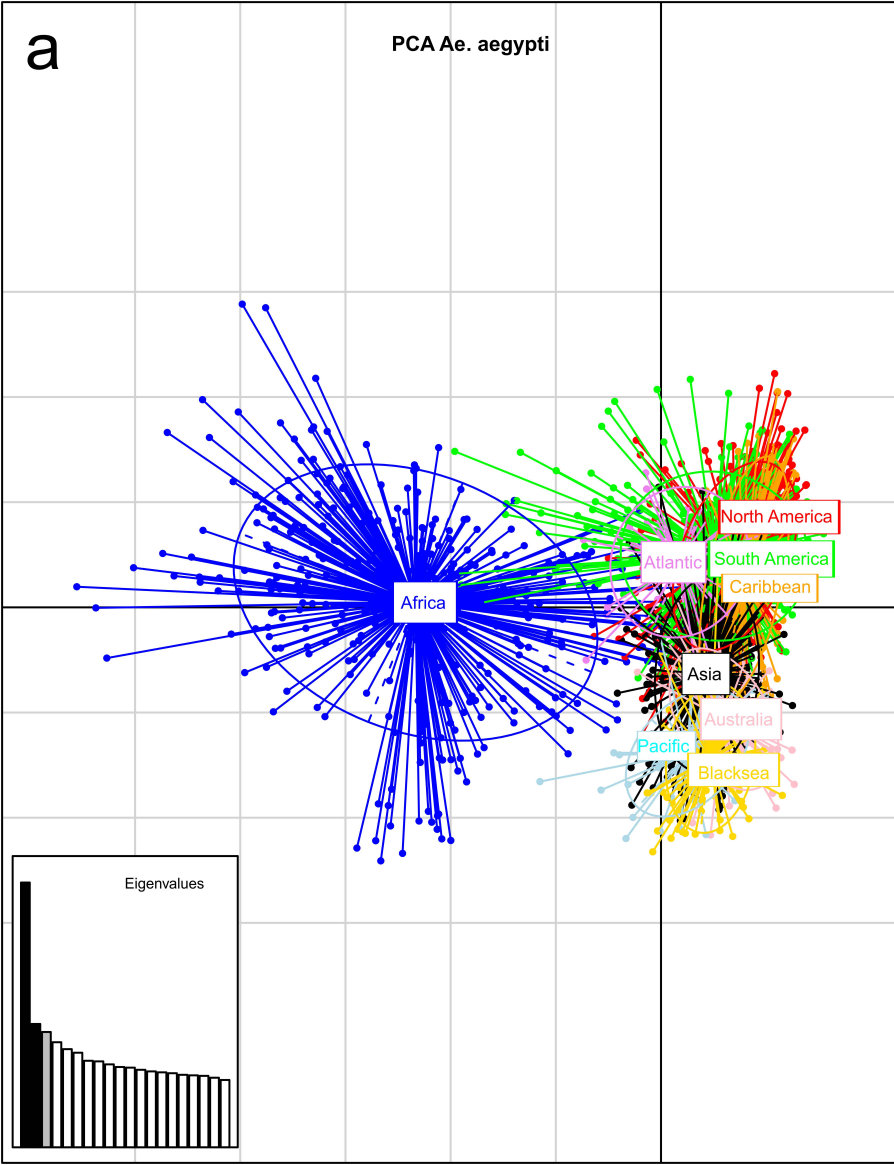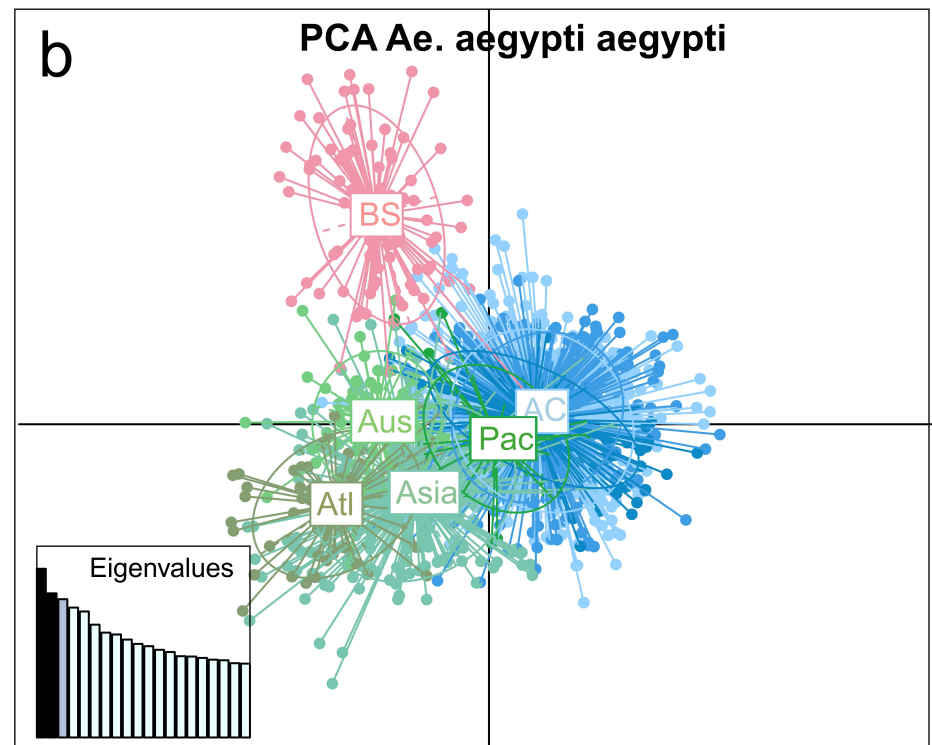

Figure S3

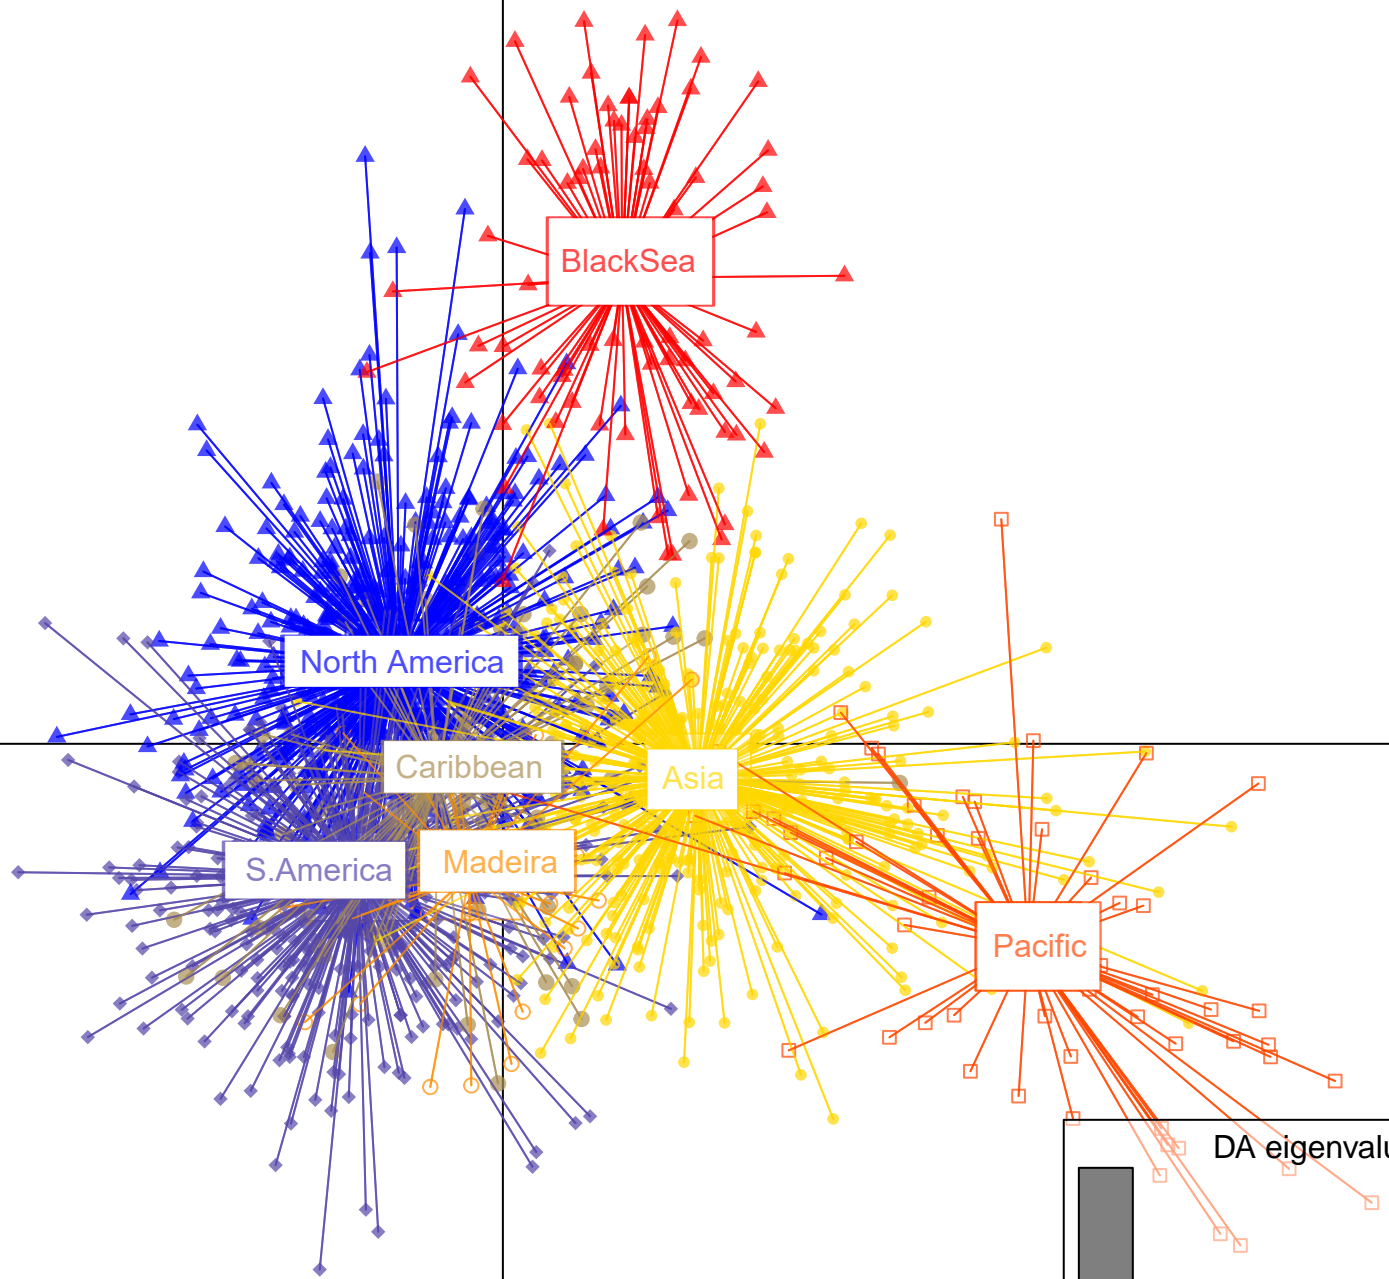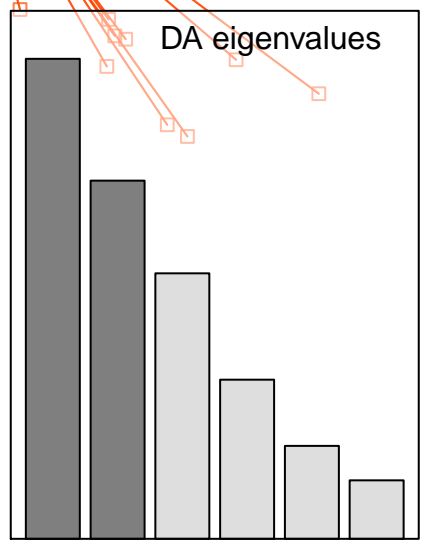

Figure S4

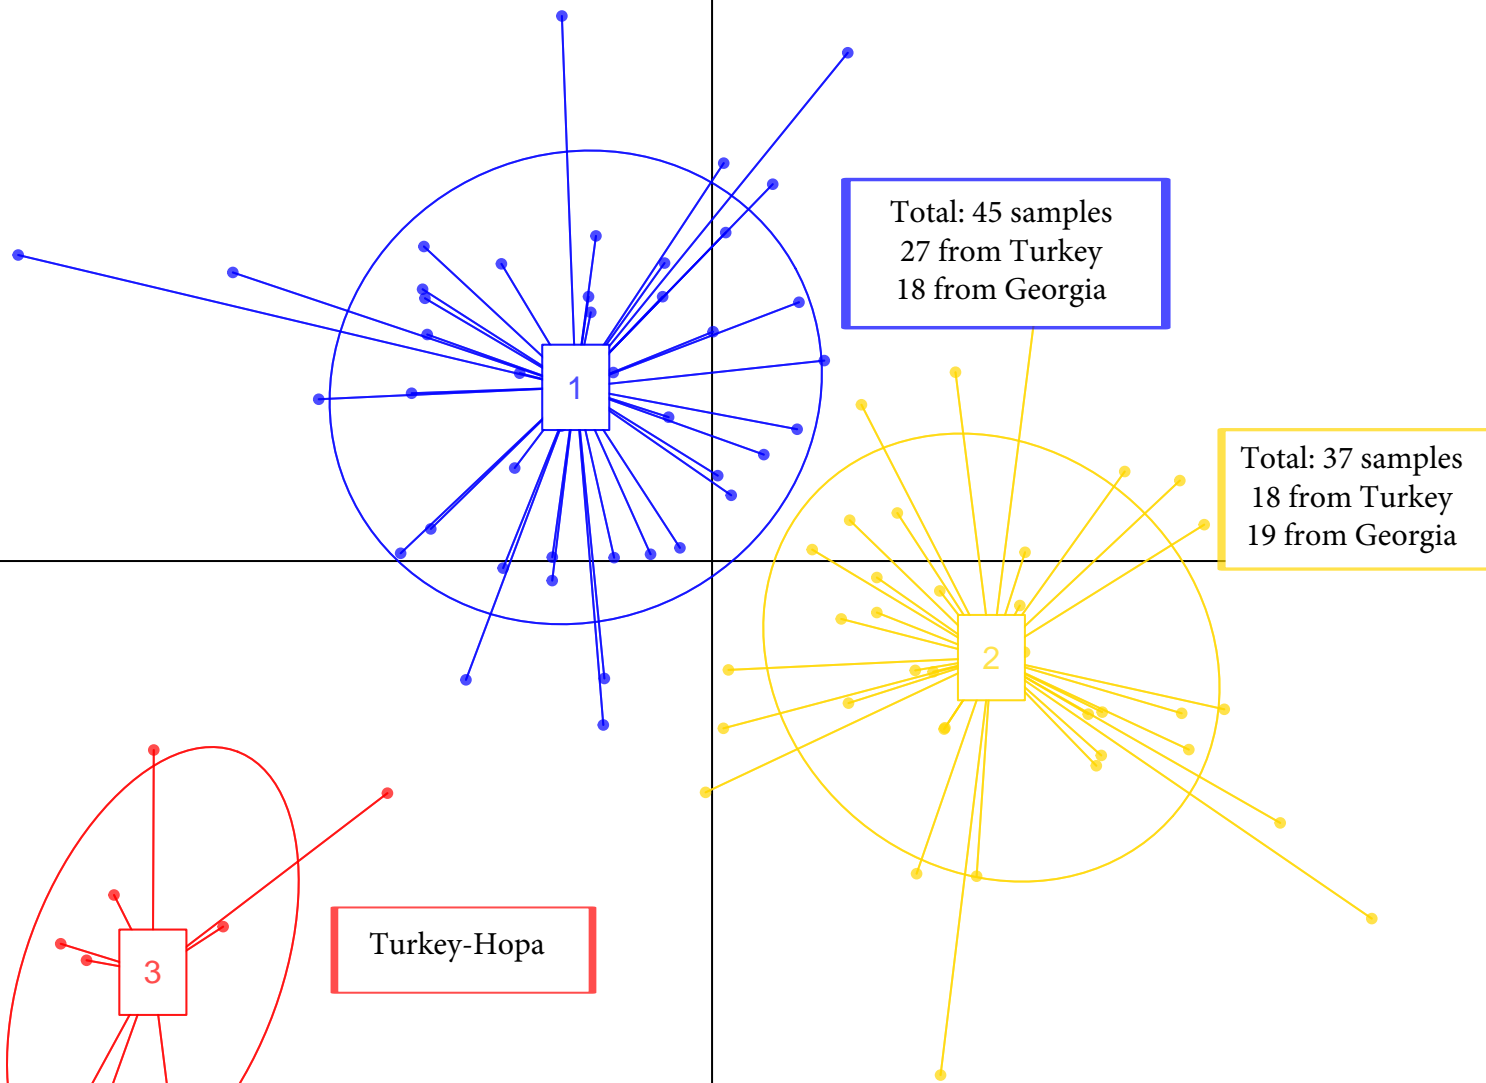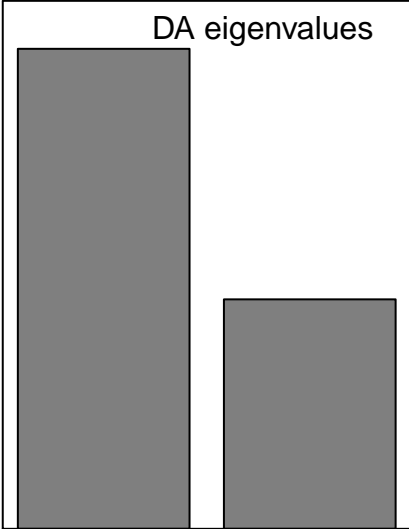

Figure S5

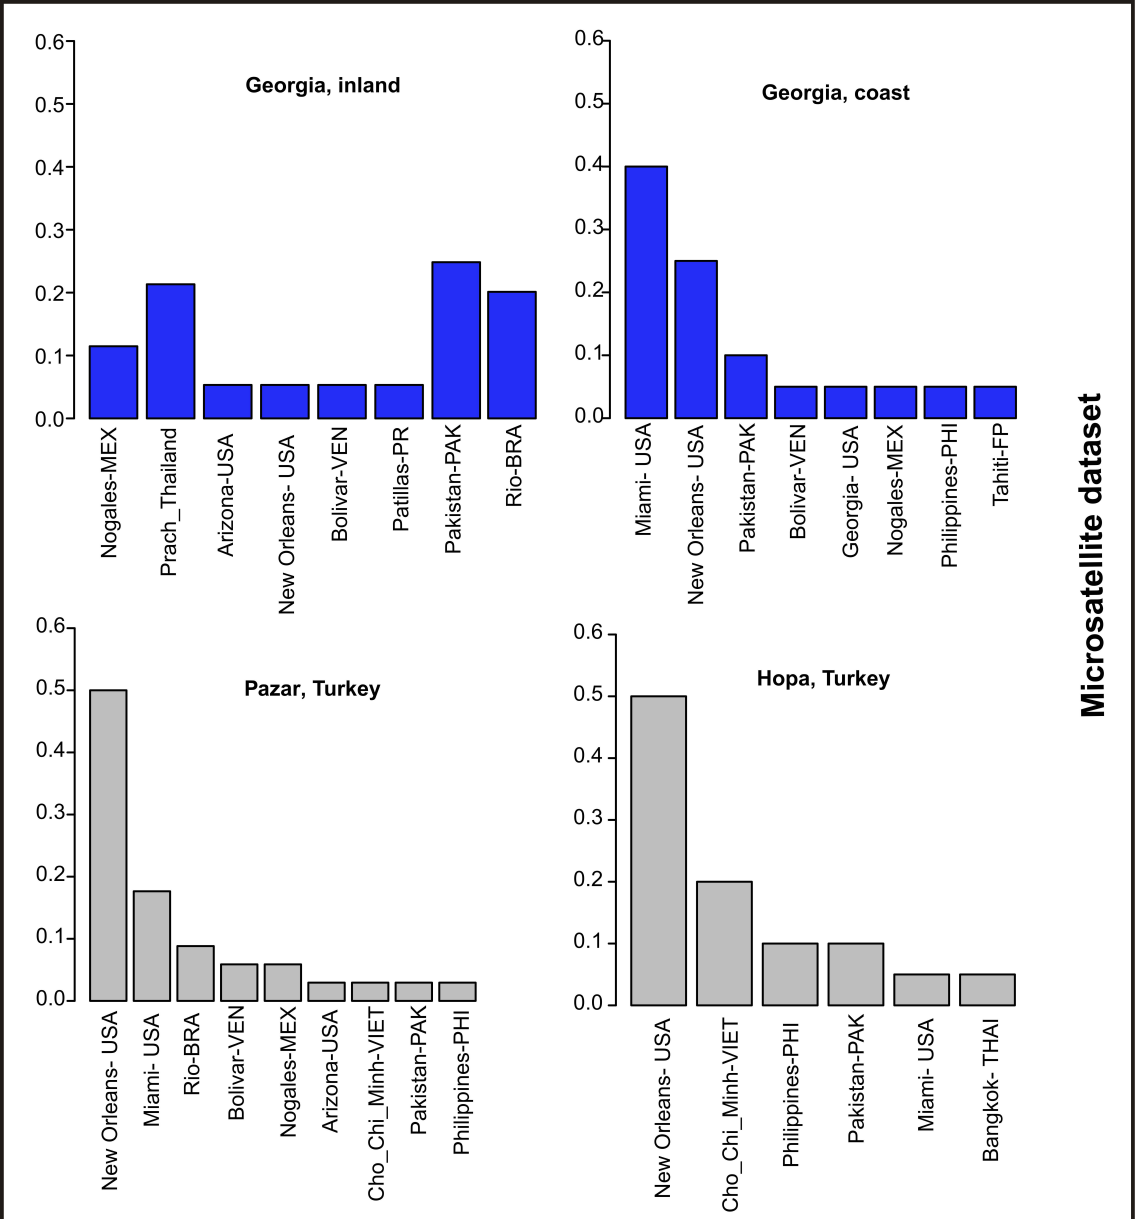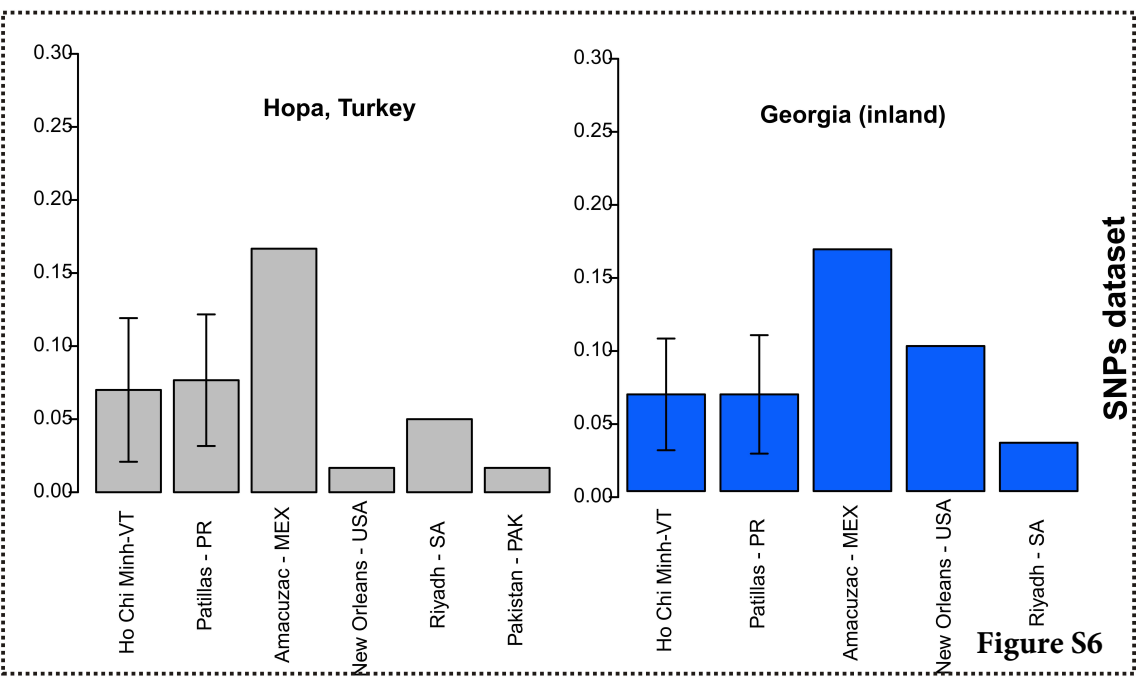

Supplement: 13071_2018_2933_MOESM1_ESM.pdf [file 13071_2018_2933_MOESM1_ESM.pdf]
